# Supplementary material for: Long-term outcomes from the phase II L-MIND study of tafasitamab (MOR208) plus lenalidomide in patients with relapsed or refractory diffuse large B-cell lymphoma
Source: PubMed Central journal article supplement — Haematologica. 2021 Jul 1;106(9):2417–26. doi: 10.3324/haematol.2020.275958 (PMC8409029; doi:10.3324/haematol.2020.275958), 2021-07-01
Supplement: 2020_275958_DUELL_SUPPL.pdf [file 2020_275958_DUELL_SUPPL.pdf]

## Long-term outcomes from the phase II L-MIND study of tafasitamab (MOR208) plus lenalidomide in patients with relapsed or refractory diffuse large B-cell lymphoma

Johannes Duell,<sup>1</sup> Kami J. Maddocks,<sup>2</sup> Eva González-Barca,<sup>3</sup> Wojciech Jurczak,<sup>4</sup> Anna Marina Liberati,<sup>5</sup> Sven de Vos,<sup>6</sup> Zsolt Nagy,<sup>7</sup> Aleš Obr,<sup>8</sup> Gianluca Gaidano,<sup>9</sup> Pau Abrisqueta,<sup>10</sup> Nagesh Kalakonda,<sup>11</sup> Marc André,<sup>12</sup> Martin Dreyling,<sup>13</sup> Tobias Menne,<sup>14</sup> Olivier Tournilhac,<sup>15</sup> Marinela Augustin,<sup>16</sup> Andreas Rosenwald,<sup>17</sup> Maren Dirnberger-Hertweck,<sup>18</sup> Johannes Weirather,<sup>18</sup> Sumeet Ambarkhane<sup>18</sup> and Gilles Salles<sup>19\*</sup>

<sup>1</sup>Medizinische Klinik und Poliklinik II, Universitätsklinik Würzburg, Würzburg, Germany; <sup>2</sup>Department of Internal Medicine, Arthur G James Comprehensive Cancer Center, Ohio State University Wexner Medical Center, Columbus, OH, USA; <sup>3</sup>Department of Hematology, Institut Català d'Oncologia (ICO), Hospital Duran i Reynals, Universitat de Barcelona, Barcelona, Spain; <sup>4</sup>Maria Skłodowska-Curie National Research Institute of Oncology, Kraków, Poland; <sup>5</sup>Università degli Studi di Perugia, Azienda Ospedaliera Santa Maria di Terni, Terni, Italy; <sup>6</sup>Department of Medicine, Ronald Reagan UCLA Medical Center, Santa Monica, CA, USA; <sup>7</sup>1<sup>st</sup> Department of Internal Medicine, Semmelweis University, Budapest, Hungary; <sup>8</sup>Department of Hemato-Oncology, Palacký University and University Hospital, Olomouc, Czech Republic; <sup>9</sup>Division of Hematology, Department of Translational Medicine, University of Eastern Piedmont, Novara, Italy; <sup>10</sup>Department of Hematology, Vall d'Hebron Institute of Oncology (VHIO), Vall d'Hebron University Hospital, Barcelona, Spain; <sup>11</sup>Molecular and Clinical Cancer Medicine, University of Liverpool and The Clatterbridge Cancer Centre, Liverpool, UK; <sup>12</sup>Department of Haematology, Université Catholique de Louvain, CHU UCL Namur, Yvoir, Belgium; <sup>13</sup>Department of Medicine III, LMU University Hospital, Munich, Germany; <sup>14</sup>Department of Haematology, Freeman Hospital, Newcastle Upon Tyne Hospitals NHS Foundation Trust, Newcastle Upon Tyne, UK; <sup>15</sup>Service d'Hématologie Clinique et de Thérapie Cellulaire, CHU Estaing, Clermont-Ferrand, France; <sup>16</sup>Department of Hematology and Oncology, Paracelsus Medical University, Klinikum Nürnberg, Nürnberg, Germany; <sup>17</sup>Institute of Pathology, University of Würzburg, Würzburg, Germany; <sup>18</sup>MorphoSys AG, Planegg, Germany and <sup>19</sup>Hématologie, Hospices Civils de Lyon and Université de Lyon, Lyon, France.

\*Current address: Lymphoma Service, Memorial Sloan Kettering Cancer Center, New York, NY, USA.

©2021 Ferrata Storti Foundation. This is an open-access paper. doi:10.3324/haematol.2020.275958

Received: November 13, 2020.

Accepted: May 11, 2021.

Pre-published: July 1, 2021.

Correspondence: GILLES SALLES - sallesg@mskcc.org

## Supplementary Material

### ST1. Refractoriness to last prior line (N=35, FAS)

| Prior treatment regimens                                              |                        |
|-----------------------------------------------------------------------|------------------------|
| Last prior treatment line                                             | N (%)                  |
| 1                                                                     | 6 (17.1)               |
| 2                                                                     | 25 (71.4)              |
| 3 or 4                                                                | 4 (11.4)               |
| Last prior treatment regimen – category                               |                        |
| Chemotherapy-based                                                    | 34 (97.1) <sup>†</sup> |
| Platinum-based                                                        | 18 (51.4) <sup>†</sup> |
| Non-platinum-based*                                                   | 16 (45.7) <sup>†</sup> |
| Chemotherapy-free regimens                                            | 1 (2.9) <sup>†</sup>   |
| HD-chemo/BEAM/ASCT                                                    | 2 (5.7) <sup>†‡</sup>  |
| Rituximab-containing                                                  | 28 (80) <sup>†‡</sup>  |
| <b>Patients with 3 or 4 lines refractory to all their prior lines</b> | 0                      |

\*Composition: predominantly R-CHOP, cyclophosphamide ± doxorubicin, and R-BEN; <sup>†</sup>Percentages are also referring to the N=35 patients refractory to their last treatment line; <sup>‡</sup>Patients are also represented among categories 'chemotherapy-based' and 'chemotherapy-free regimens'.

BEAM, carmustine, etoposide, cytarabine, melphalan; BEN, bendamustine; HD-chemo, high dose chemotherapy; R-CHOP, rituximab, cyclophosphamide, doxorubicin, vincristine, prednisolone.

## ST2. Selected infection- and rash-related adverse events

Changes compared with the primary analysis are indicated by an arrow

| Event                                      | All Grades, n (%)        | Grade 1, n (%) | Grade 2, n (%)        | Grade 3, n (%)           | Grade 4, n (%) | Grade ≥3, n (%)          |
|--------------------------------------------|--------------------------|----------------|-----------------------|--------------------------|----------------|--------------------------|
| <b>Infective pneumonia*</b>                |                          |                |                       |                          |                |                          |
| All infective pneumonia                    | 8 (9.9) →<br>12 (14.8)   | 0              | 1 (1.2) →<br>2 (2.5)  | 6 (7.4) →<br>9 (11.1)    | 1 (1.2)        | 7 (8.6) →<br>10 (12.3)   |
| Pneumonia                                  | 6 (7.4) →<br>10 (12.3)   | 0              | 1 (1.2) →<br>2 (2.5)  | 5 (6.2) →<br>8 (9.9)     | 0              | 5 (6.2) →<br>8 (9.9)     |
| Bronchopulmonary aspergillosis             | 1 (1.2)                  | 0              | 0                     | 0                        | 1 (1.2)        | 1 (1.2)                  |
| Lung infection                             | 1 (1.2) → 0 <sup>‡</sup> | 0              | 0                     | 1 (1.2) → 0 <sup>‡</sup> | 0              | 1 (1.2) → 0 <sup>‡</sup> |
| <b>Sepsis<sup>†</sup></b>                  |                          |                |                       |                          |                |                          |
| All sepsis                                 | 4 (4.9)                  | 0              | 0                     | 2 (2.5)                  | 2 (2.5)        | 4 (4.9)                  |
| Klebsiella sepsis                          | 1 (1.2)                  | 0              | 0                     | 1 (1.2)                  | 0              | 1 (1.2)                  |
| Neutropenic sepsis                         | 1 (1.2)                  | 0              | 0                     | 1 (1.2)                  | 0              | 1 (1.2)                  |
| Sepsis                                     | 1 (1.2)                  | 0              | 0                     | 0                        | 1 (1.2)        | 1 (1.2)                  |
| Streptococcal sepsis                       | 1 (1.2)                  | 0              | 0                     | 0                        | 1 (1.2)        | 1 (1.2)                  |
| <b>Urinary tract infection<sup>†</sup></b> |                          |                |                       |                          |                |                          |
| All urinary tract infection                | 14 (17.2) →<br>17 (21.0) | 2 (2.5)        | 7 (8.6) →<br>9 (11.1) | 3 (3.7)                  | 1 (1.2)        | 4 (4.9)                  |
| Urinary tract infection                    | 7 (8.6) →<br>10 (12.3)   | 2 (2.5)        | 3 (3.7) →<br>6 (7.4)  | 1 (1.2)                  | 1 (1.2)        | 2 (2.5)                  |
| Escherichia urinary tract infection        | 4 (4.9)                  | 0              | 3 (3.7)               | 1 (1.2)                  | 0              | 1 (1.2)                  |
| Bacterial urinary tract infection          | 2 (2.5)                  | 0              | 2 (2.5)               | 0                        | 0              | 0                        |
| Enterococcal urinary tract infection       | 1 (1.2)                  | 0              | 0                     | 1 (1.2)                  | 0              | 1 (1.2)                  |

| Rash†               |                          |                          |                          |         |   |         |
|---------------------|--------------------------|--------------------------|--------------------------|---------|---|---------|
| All rash            | 37 (45.7) →<br>40 (49.4) | 18 (22.2) →<br>19 (23.5) | 12 (14.8) →<br>14 (17.3) | 7 (8.6) | 0 | 7 (8.6) |
| Pruritus            | 8 (9.9)                  | 4 (4.9)                  | 3 (3.7)                  | 1 (1.2) | 0 | 1 (1.2) |
| Rash                | 6 (7.4) →<br>7 (8.6)     | 2 (2.5)                  | 4 (4.9) →<br>5 (6.2)     | 0       | 0 | 0       |
| Allergic dermatitis | 4 (4.9)                  | 0                        | 1 (1.2)                  | 3 (3.7) | 0 | 3 (3.7) |
| Maculo-papular rash | 4 (4.9)                  | 3 (3.7)                  | 0                        | 1 (1.2) | 0 | 1 (1.2) |
| Dry skin            | 3 (3.7)                  | 2 (2.5)                  | 1 (1.2)                  | 0       | 0 | 0       |
| Erythema            | 3 (3.7)                  | 3 (3.7)                  | 0                        | 0       | 0 | 0       |
| Dermatitis          | 1 (1.2)                  | 1 (1.2)                  | 0                        | 0       | 0 | 0       |
| Eczema              | 1 (1.2) →<br>2 (2.4)     | 1 (1.2)                  | 0 → 1 (1.2)              | 0       | 0 | 0       |
| Papule              | 1 (1.2)                  | 1 (1.2)                  | 0                        | 0       | 0 | 0       |
| Psoriasis           | 1 (1.2)                  | 0                        | 0                        | 1 (1.2) | 0 | 1 (1.2) |
| Erythematous rash   | 1 (1.2)                  | 0                        | 0                        | 1 (1.2) | 0 | 1 (1.2) |
| Pruritic rash       | 1 (1.2)                  | 1 (1.2)                  | 0                        | 0       | 0 | 0       |
| Rebound psoriasis   | 1 (1.2)                  | 0                        | 1 (1.2)                  | 0       | 0 | 0       |
| Skin lesion         | 1 (1.2) →<br>2 (2.5)     | 0 → 1 (1.2)              | 1 (1.2)                  | 0       | 0 | 0       |
| Toxic skin eruption | 1 (1.2)                  | 0                        | 1 (1.2)                  | 0       | 0 | 0       |

\*Defined by Standard Medical Dictionary for Regulatory Activities query, narrow scope. Neither *Pneumocystis jirovecii* pneumonia nor *Pneumocystis carinii* pneumonia prophylaxis was administered; †Defined by customized Medical Dictionary for Regulatory Activities query; ‡At the time of data cut-off, the Preferred Term 'lung infection' had been discontinued. This case was re-coded and is now reported under the Preferred Term 'pneumonia'.

## **Supplementary Methods**

### *Eligibility criteria*

Eligible patients were aged >18 years with histologically-confirmed R/R DLBCL (including transformed indolent lymphoma with a subsequent DLBCL relapse), had received 1–3 prior systemic regimens including  $\geq 1$  anti-CD20 therapy, had Eastern Cooperative Oncology Group performance status 0–2, and were not candidates for high-dose chemotherapy and subsequent ASCT.

### *Tumor assessment*

Tumor assessment was based on computerized tomography scans conducted after cycles 2, 4, 6, and 9 and positron emission tomography, which was mandatory at baseline and after cycle 12. Central laboratory assessments were performed on day 1 ( $\pm 2$  days) of cycles 1–24. Adverse events were recorded at each visit.

### *Sample size determination and statistics*

The sample size of 80 patients was determined using an exact binomial test with a two-sided significance level of 5% and a power of 85%, assuming a drop-out rate of 10% and that treatment with tafasitamab plus lenalidomide could increase the objective response rate by 15% vs monotherapy.

Descriptive statistics were used to summarize response rates and safety outcomes. Progression-free survival, overall survival, and duration of response were analyzed using the Kaplan–Meier method, and 95% confidence intervals for the median calculated accordingly. The median follow-up for progression-free survival and overall survival was calculated using the reverse Kaplan–Meier method. Statistical analysis was performed using SAS<sup>®</sup> Software version 9.4 or above (SAS Institute, Cary, NC).

## Supplementary Results

*Narratives for patients who received stem-cell transplant (SCT) after tafasitamab (n=2)*

One patient who received SCT had diffuse large B-cell lymphoma (DLBCL) from marginal zone lymphoma transformation and had received autologous SCT 4 years prior to enrollment progressed after seven cycles of therapy in L-MIND, received further chemotherapy and allogenic SCT and died 4 months after allogenic SCT.

The other patient progressed after three cycles in L-MIND, received a further two lines of chemotherapy and autologous SCT but died 8 days later.

*Narratives for patients who received chimeric antigen receptor T-cell therapy (CAR)-T after tafasitamab (n=2)*

One patient who received CAR-T therapy had germinal center B-like DLBCL as a result of follicular lymphoma transformation and prior to L-MIND had experienced 2-year complete responses to R-EPOCH (rituximab, etoposide, prednisone, vincristine, cyclophosphamide, doxorubicin) and R-ICE (rituximab, ifosfamide, carboplatin, etoposide); she had also declined autologous SCT. She received six cycles of therapy in L-MIND (with a stable disease response) before progression, received further chemotherapy with R-GemOx for four cycles (with a partial response), then received CAR-T with a complete response 1 month after treatment; this patient had remained in complete response for 1 year but died approximately 2-years post CAR-T treatment due to acute myeloid leukemia.

The other patient had received autologous SCT before enrollment to L-MIND and experienced disease progression in L-MIND after eight cycles; this patient did not respond to further chemotherapy or CAR-T, and died 4 months after CAR-T therapy.

**SF1. PFS in patients with (A) primary refractory DLBCL, (B) rituximab-refractory DLBCL, and (C) last-therapy refractory DLBCL**

A.

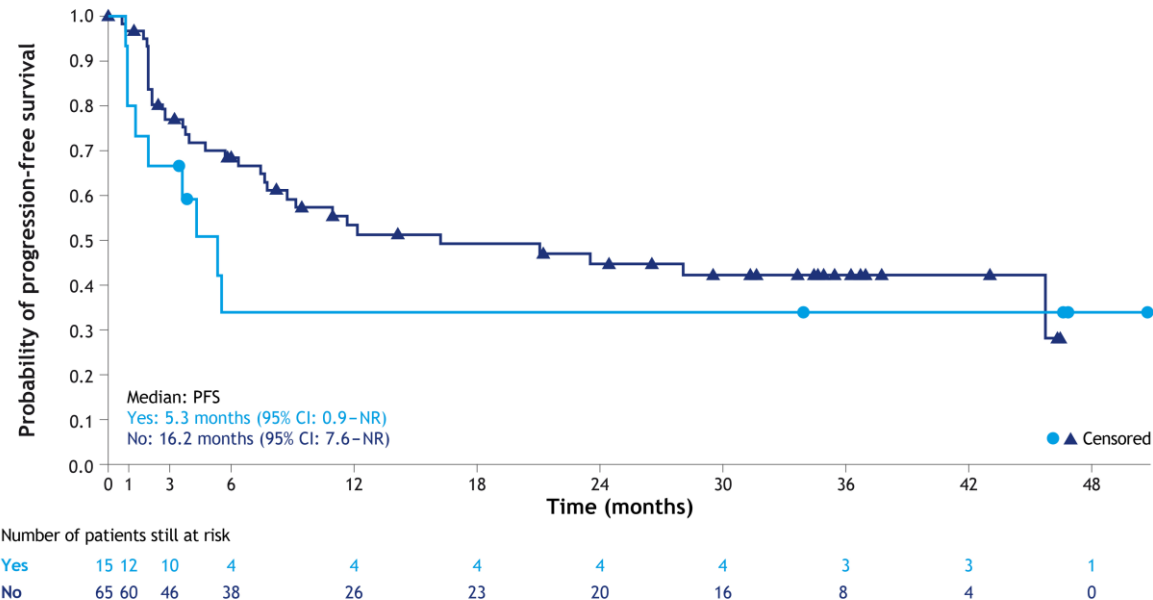

B.

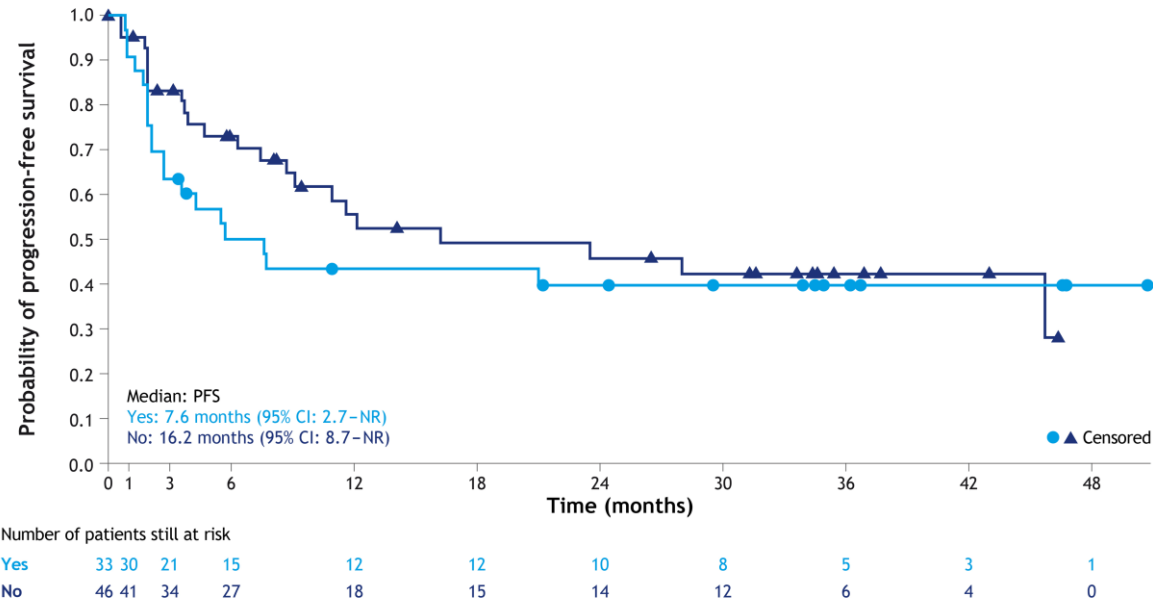

C.

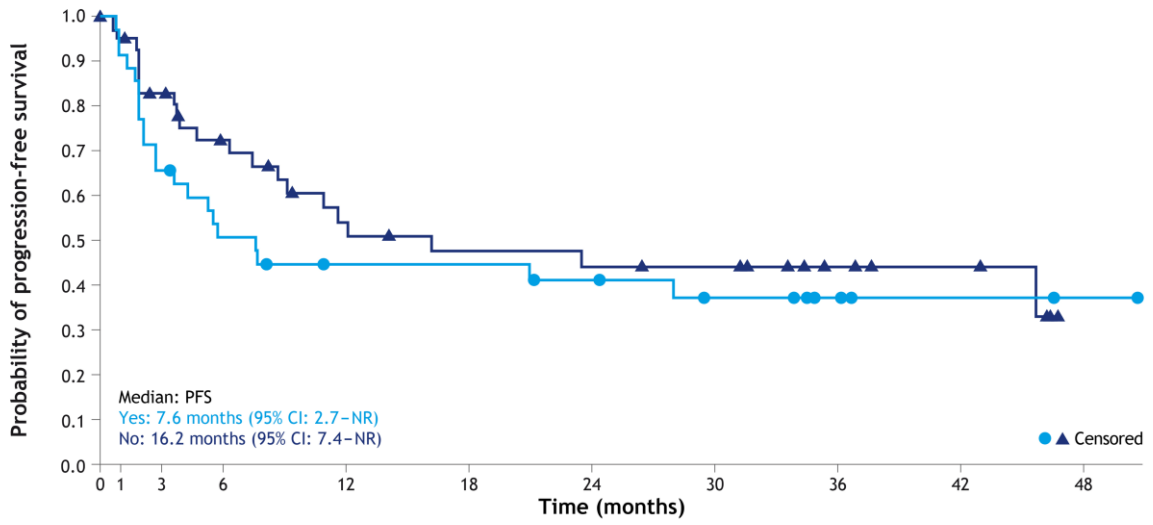

Number of patients still at risk

|     |    |    |    |    |    |    |    |    |   |   |   |
|-----|----|----|----|----|----|----|----|----|---|---|---|
| Yes | 35 | 32 | 23 | 17 | 13 | 13 | 11 | 8  | 4 | 2 | 1 |
| No  | 45 | 40 | 33 | 25 | 17 | 14 | 13 | 12 | 7 | 5 | 0 |



**SF2. Swimmer plot of progression-free survival for patients with diffuse large B-cell lymphoma arising from transformation of low-grade lymphoma and double- or triple-hit lymphoma**

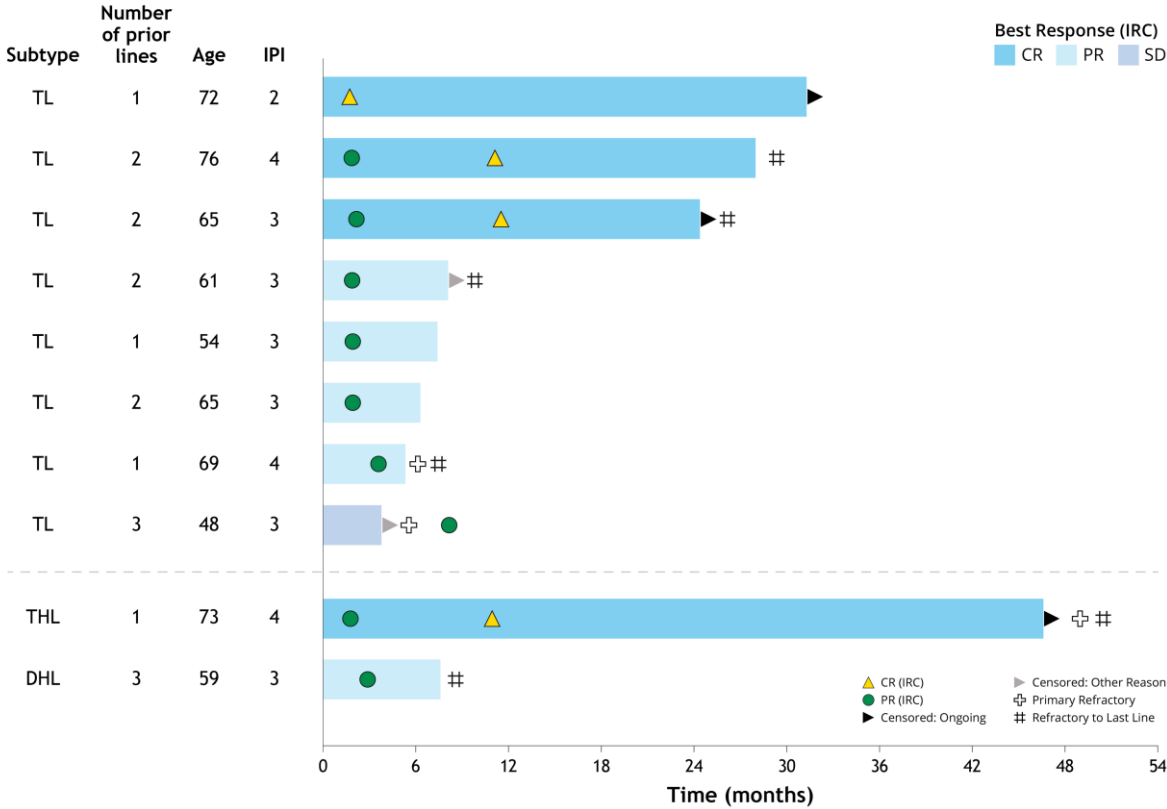

Both patients 'Censored: Other Reason' had received prohibited concomitant medication.

CR, complete response; DHL, double-hit lymphoma; IPI, International Prognostic Index; IRC, independent review committee; PR, partial response; SD, stable disease; THL, triple-hit lymphoma; TL, transformed low-grade lymphoma.
